# Supplementary material for: Combination Therapies Prevent the Neuropathic, Proinflammatory Characteristics of Bone Marrow in Streptozotocin-Induced Diabetic Rats
Source: Oxford University Press journal article supplement (doi:10.2337/db14-0433), 2014-09-09
Supplement: db140433supplementarydata.pdf [file db140433supplementarydata.pdf]

## SUPPLEMENTARY DATA

**Supplementary Figure 1a.** CGRP staining of middle distal femoral marrow. Figures show representative CGRP staining before (top gray images) and after (bottom blue images) quantification by Aperio using the Positive Pixel Count algorithm. In the markup images, positive stain is indicated by yellow (weak positive), orange (middle positive) and red (strong positive). Con, non-diabetic control; DM, diabetic; Ile, ilepatril treatment; Fid + LA, fidarestat and lipoic acid treatment; Menh + Ins, insulin and menhaden oil treatment. Scale bar is 300 $\mu$ M.  $n = 7$  to 12 animals per group.

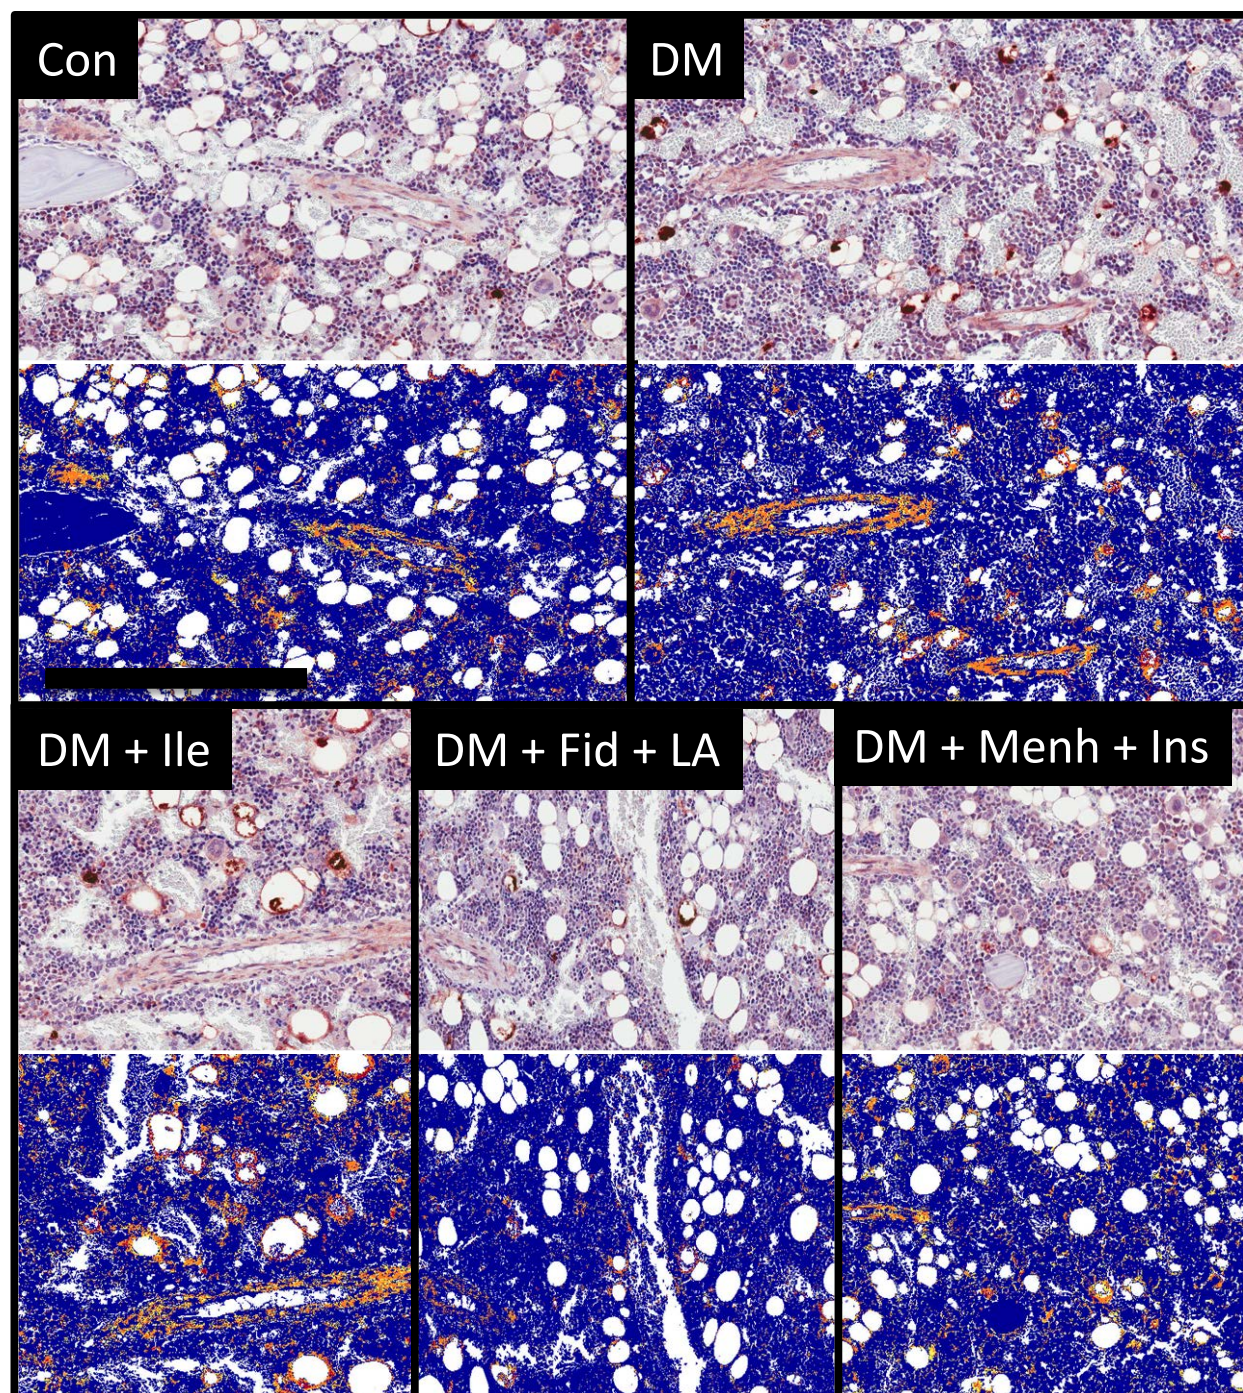

## SUPPLEMENTARY DATA

**Supplementary Figure 1b.** Ratio of strong-positive CGRP pixels to total positive pixels in the middle distal femur. Con, non-diabetic control; DM, diabetic; Ile, ilepatril treatment; Fid + LA, fidarestat and lipoic acid treatment; Menh + Ins, insulin and menhaden oil treatment. Data represent mean  $\pm$  SD. There was no statistical significance between groups.

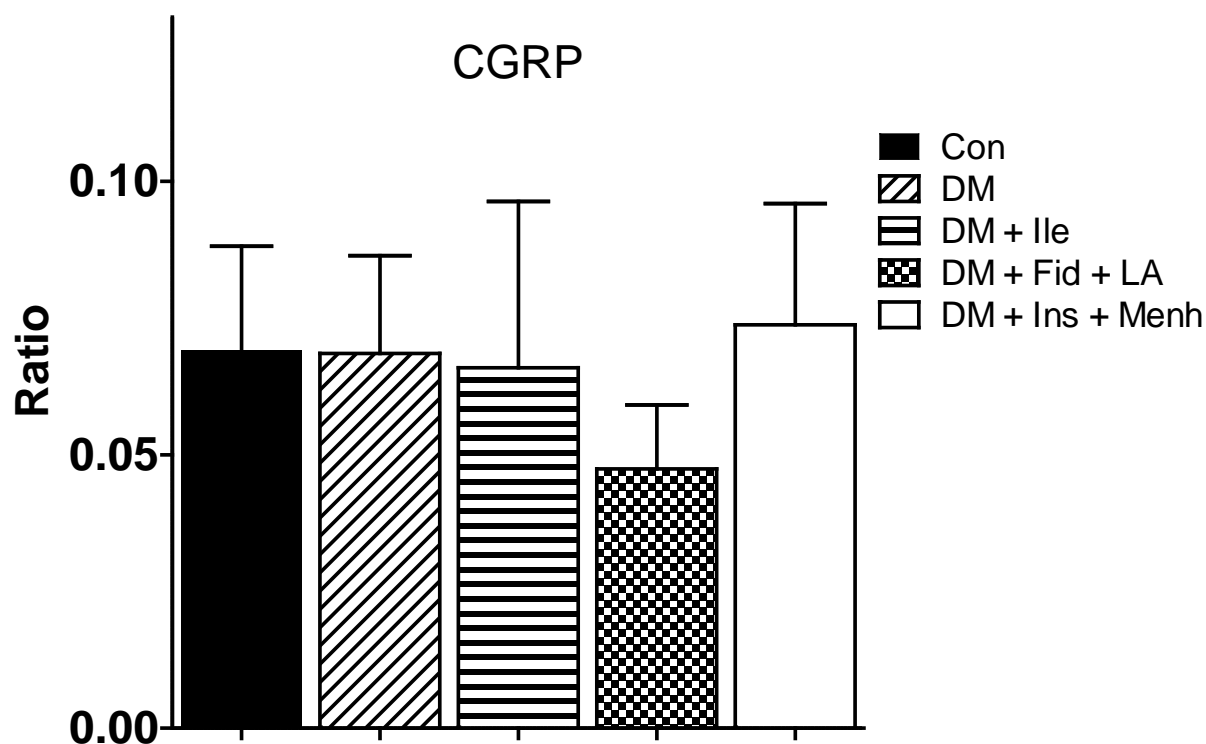



# SUPPLEMENTARY DATA

**Supplementary Figure 2.** Femoral marrow ACE-2. Con, non-diabetic control; DM, diabetic; Ile, ilepatril treatment; Fid + LA, fidarestat and lipoic acid treatment; Menh + Ins, insulin and menhaden oil treatment. Data represent mean  $\pm$  SD. ND, not detected. Statistics could not be applied due to low detection in DM and treatment groups.

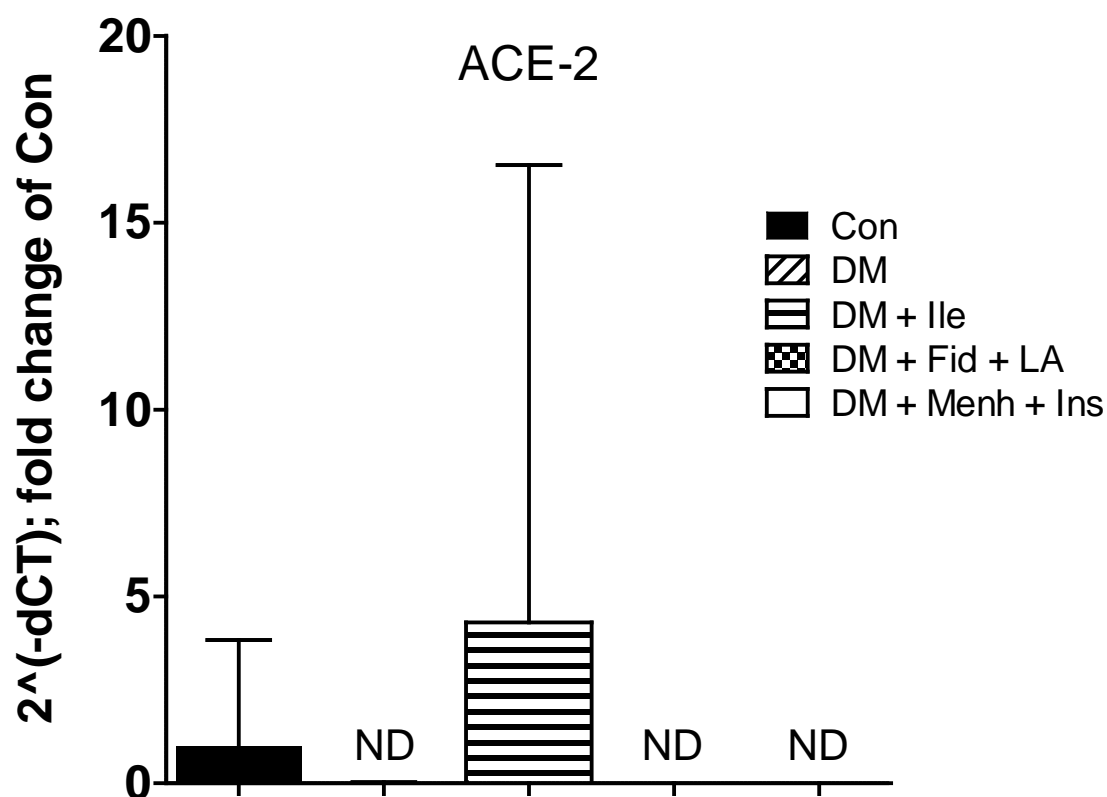

# SUPPLEMENTARY DATA

**Supplementary Figure 3.** Femoral marrow AgtR-1a. Con, non-diabetic control; DM, diabetic; Ile, ilepatril treatment; Fid + LA, fidarestat and lipoic acid treatment; Menh + Ins, insulin and menhaden oil treatment. Data represent mean  $\pm$  SD. ND, not detected. Statistics could not be applied due to low detection in treatment groups.

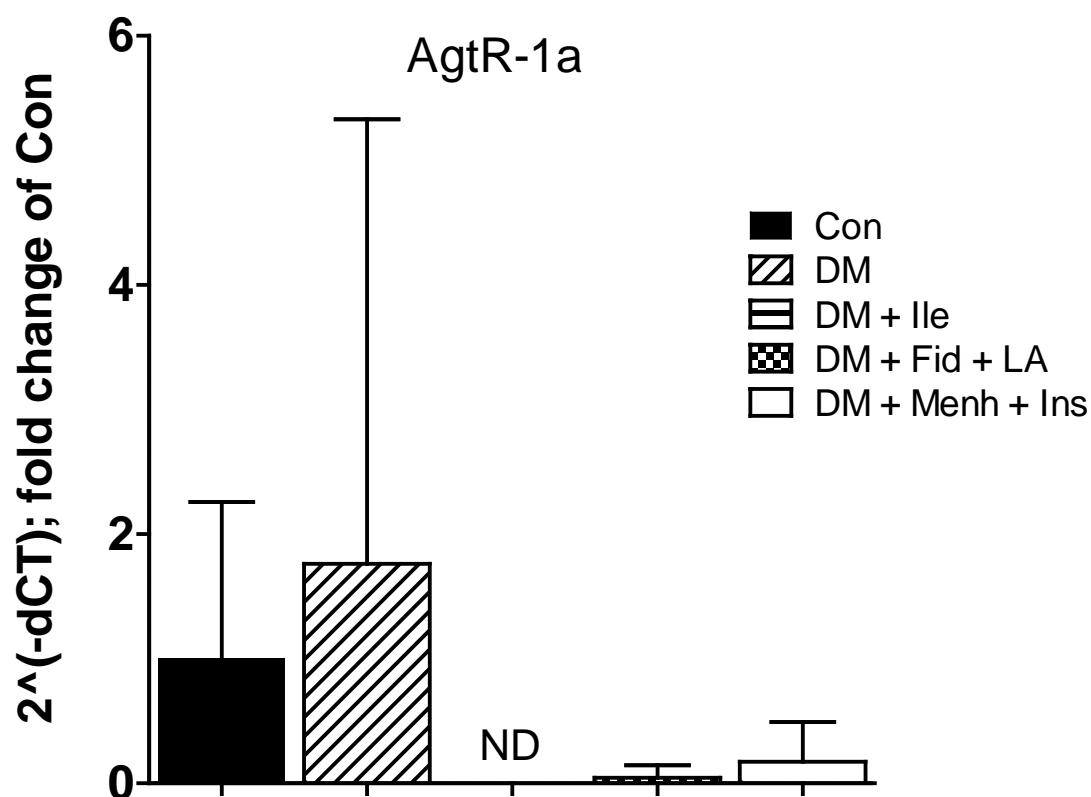

## SUPPLEMENTARY DATA

**Supplementary Table 1.** Ingested drug, method of delivery and dosage

| Agent        | Mechanism                       | Delivery method | Dosage*  |
|--------------|---------------------------------|-----------------|----------|
| Ilepatril    | Neutral endopeptidase inhibitor | Chow            | 500mg    |
| Lipoic acid  | Antioxidant                     | Chow            | 0.25g    |
| Fidarestat   | Aldose reductase inhibitor      | Chow            | 3mg      |
| Menhaden oil | Enriched in EPA and DHA         | Chow            | 25% kCal |

Asterisk = Per kilogram chow

**Supplementary Table 2.** Antigen retrieval protocols

| Primary antibody                 | Pre-treatment reagent      | Pre-treatment time       |
|----------------------------------|----------------------------|--------------------------|
| Rabbit anti-neuropeptide Y       | Scytek Citrate Plus pH 6.0 | Overnight in oven @ 56°C |
| Rabbit anti-somatostatin         | Scytek Citrate Plus pH 6.0 | Overnight in oven @ 56°C |
| Rabbit anti-tyrosine hydroxylase | 0.03% Pronase E in TBS     | 10 minutes @ 37°C        |
| Mouse anti-8-oxo-dG              | Scytek Citrate Plus pH 6.0 | Overnight in oven @ 56°C |
| Rabbit anti-CGRP                 | Scytek Citrate Plus pH 6.0 | Overnight in oven @ 56°C |

# SUPPLEMENTARY DATA

**Supplementary Table 3.** Primary antibody dilutions

| Primary antibody                 | Clone                                     | Catalog #   | Dilution | Vendor       |
|----------------------------------|-------------------------------------------|-------------|----------|--------------|
| Rabbit anti-neuropeptide Y       | Rabbit polyclonal to neuropeptide Y       | NBP1-19808  | 1:200    | Novus        |
| Rabbit anti-somatostatin         | Rabbit polyclonal to somatostatin         | ab103790    | 1:100    | Abcam        |
| Rabbit anti-tyrosine hydroxylase | Rabbit polyclonal to tyrosine hydroxylase | AB152       | 1:100    | Millipore    |
| Mouse anti-8-oxo-dG              | 2E2                                       | 4354-MC-050 | 1:200    | Trevigen     |
| Rabbit anti-CGRP                 | Rabbit polyclonal to Rat CGRP             | PA5-19755   | 1:200    | ThermoFisher |
